# Supplementary material
Source: PubMed Central journal article supplement (PMC2659501)

# **Synthesis and Biological Evaluation of a Novel 5-6-5 Imidazole-Phenyl-Thiazole Based $\alpha$ -Helix Mimetic**

Christopher G. Cummings, Nathan T. Ross, William P. Katt, and Andrew D. Hamilton

## **SUPPORTING INFORMATION 2: Spectral Data**

**4-bromo-2-methylbenzothioamide (2):  $^1\text{H}$  and  $^{13}\text{C}$**

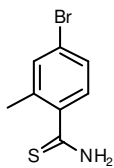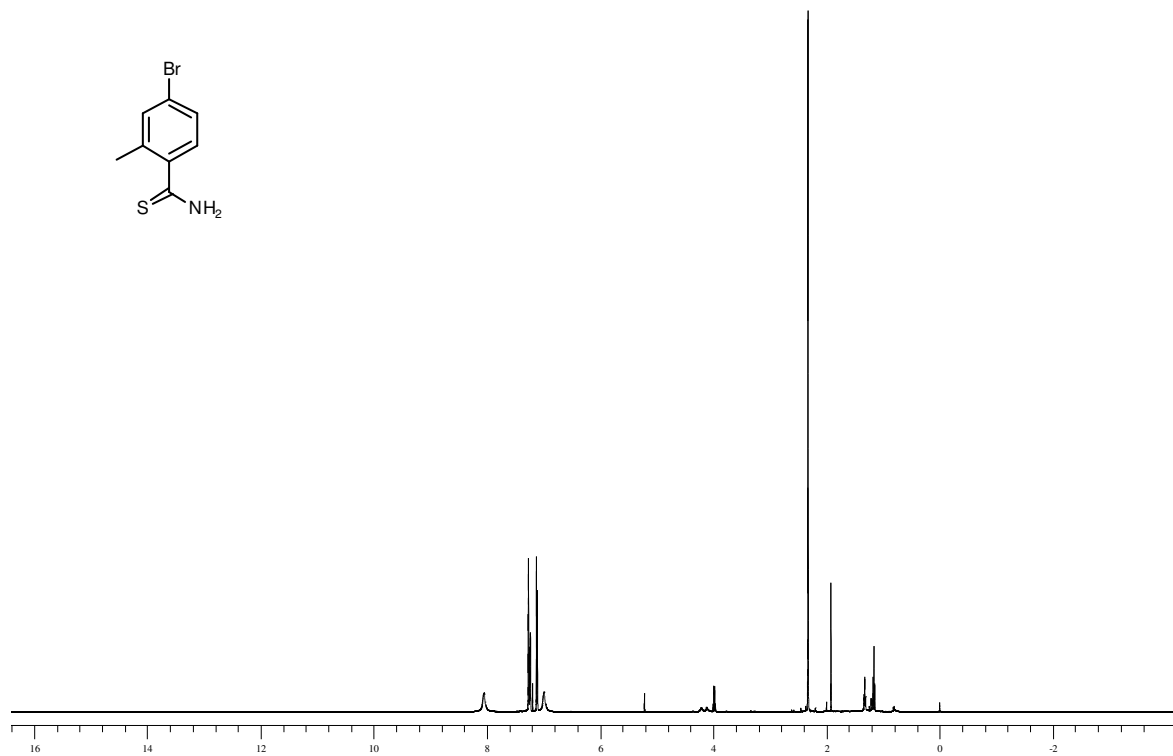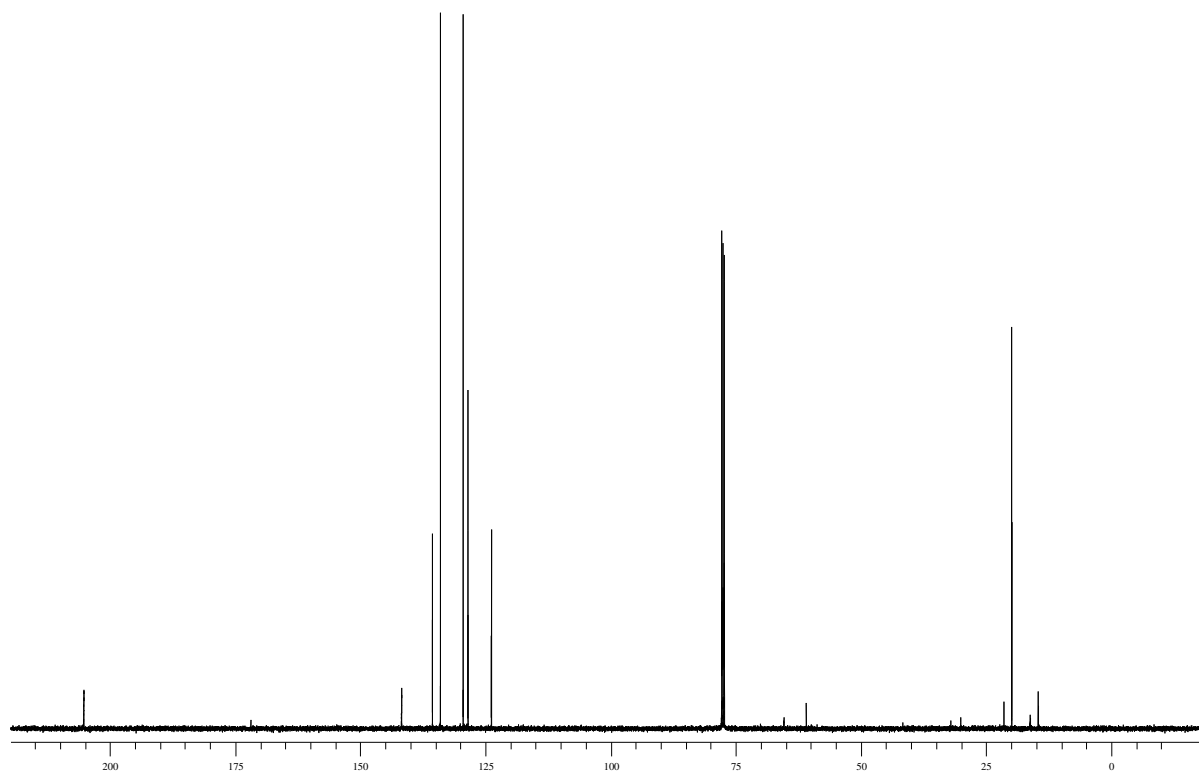

2-(4-bromo-2-methylphenyl)-4-methylthiazole(3):  $^1\text{H}$  and  $^{13}\text{C}$

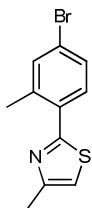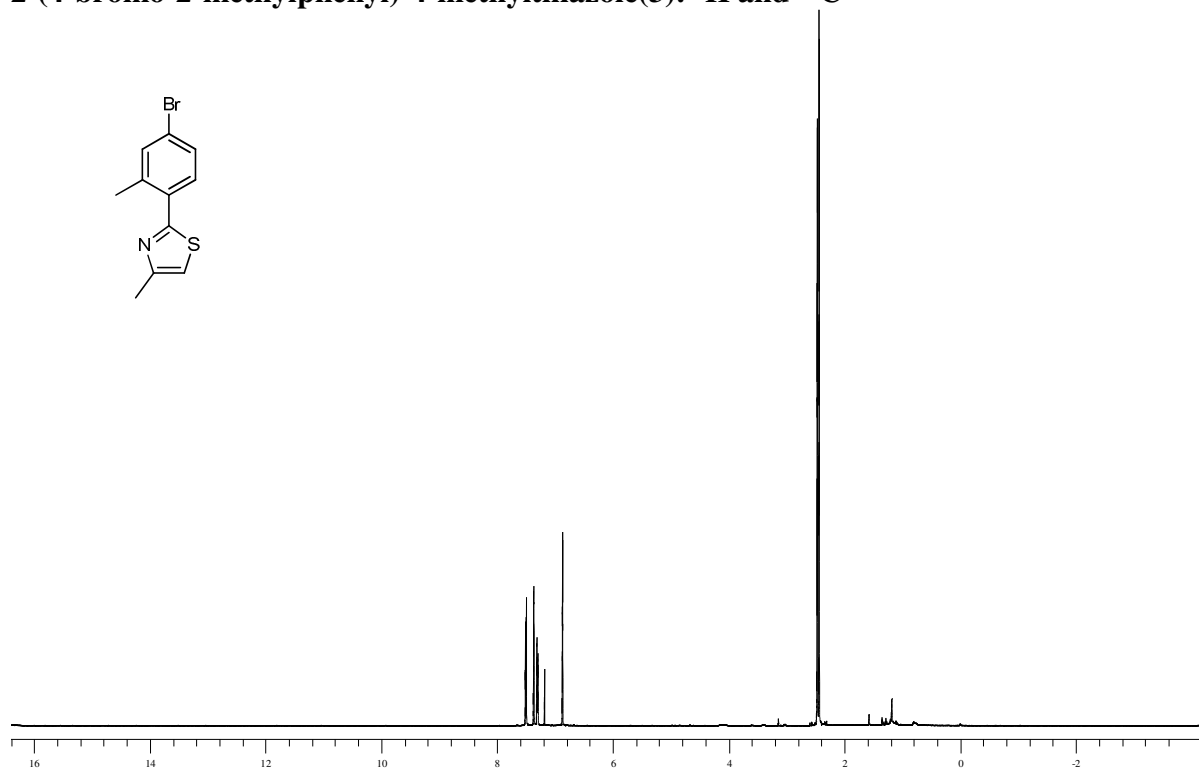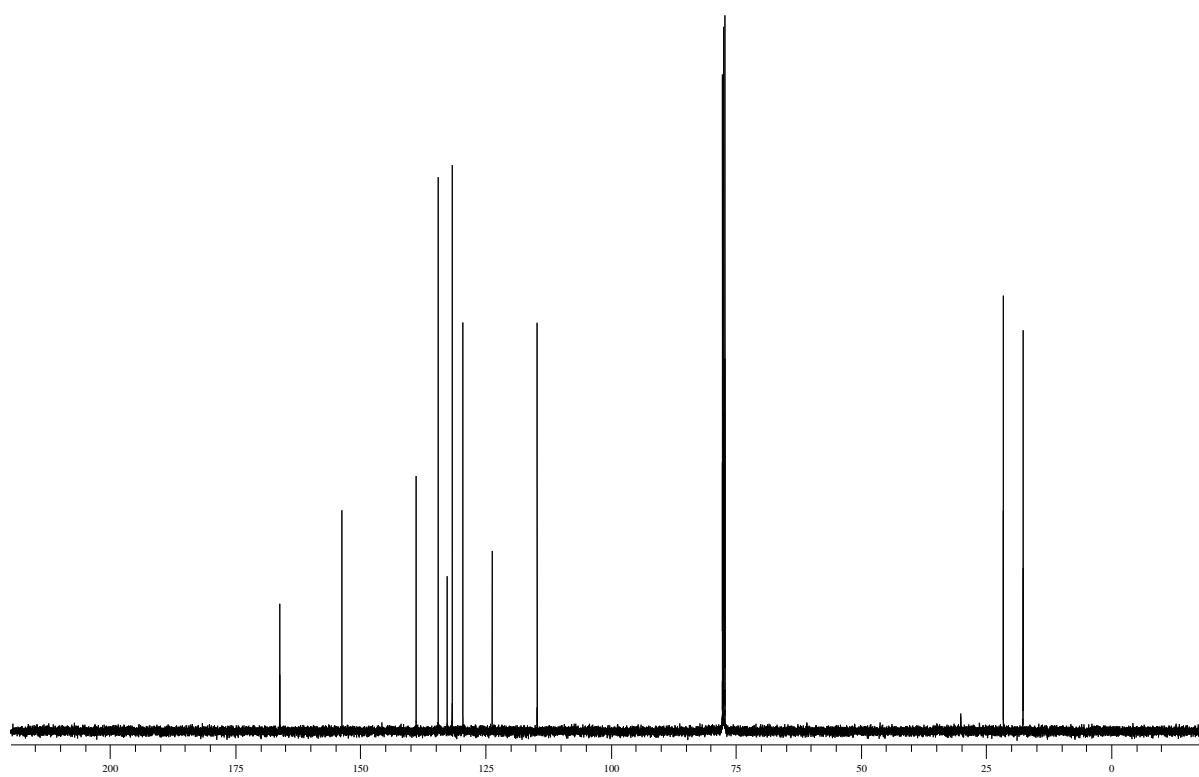

**4-methyl-2-(2-methyl-4-(2-methyl-1H-imidazol-1-yl)phenyl)thiazole(4):  $^1\text{H}$  and  $^{13}\text{C}$**

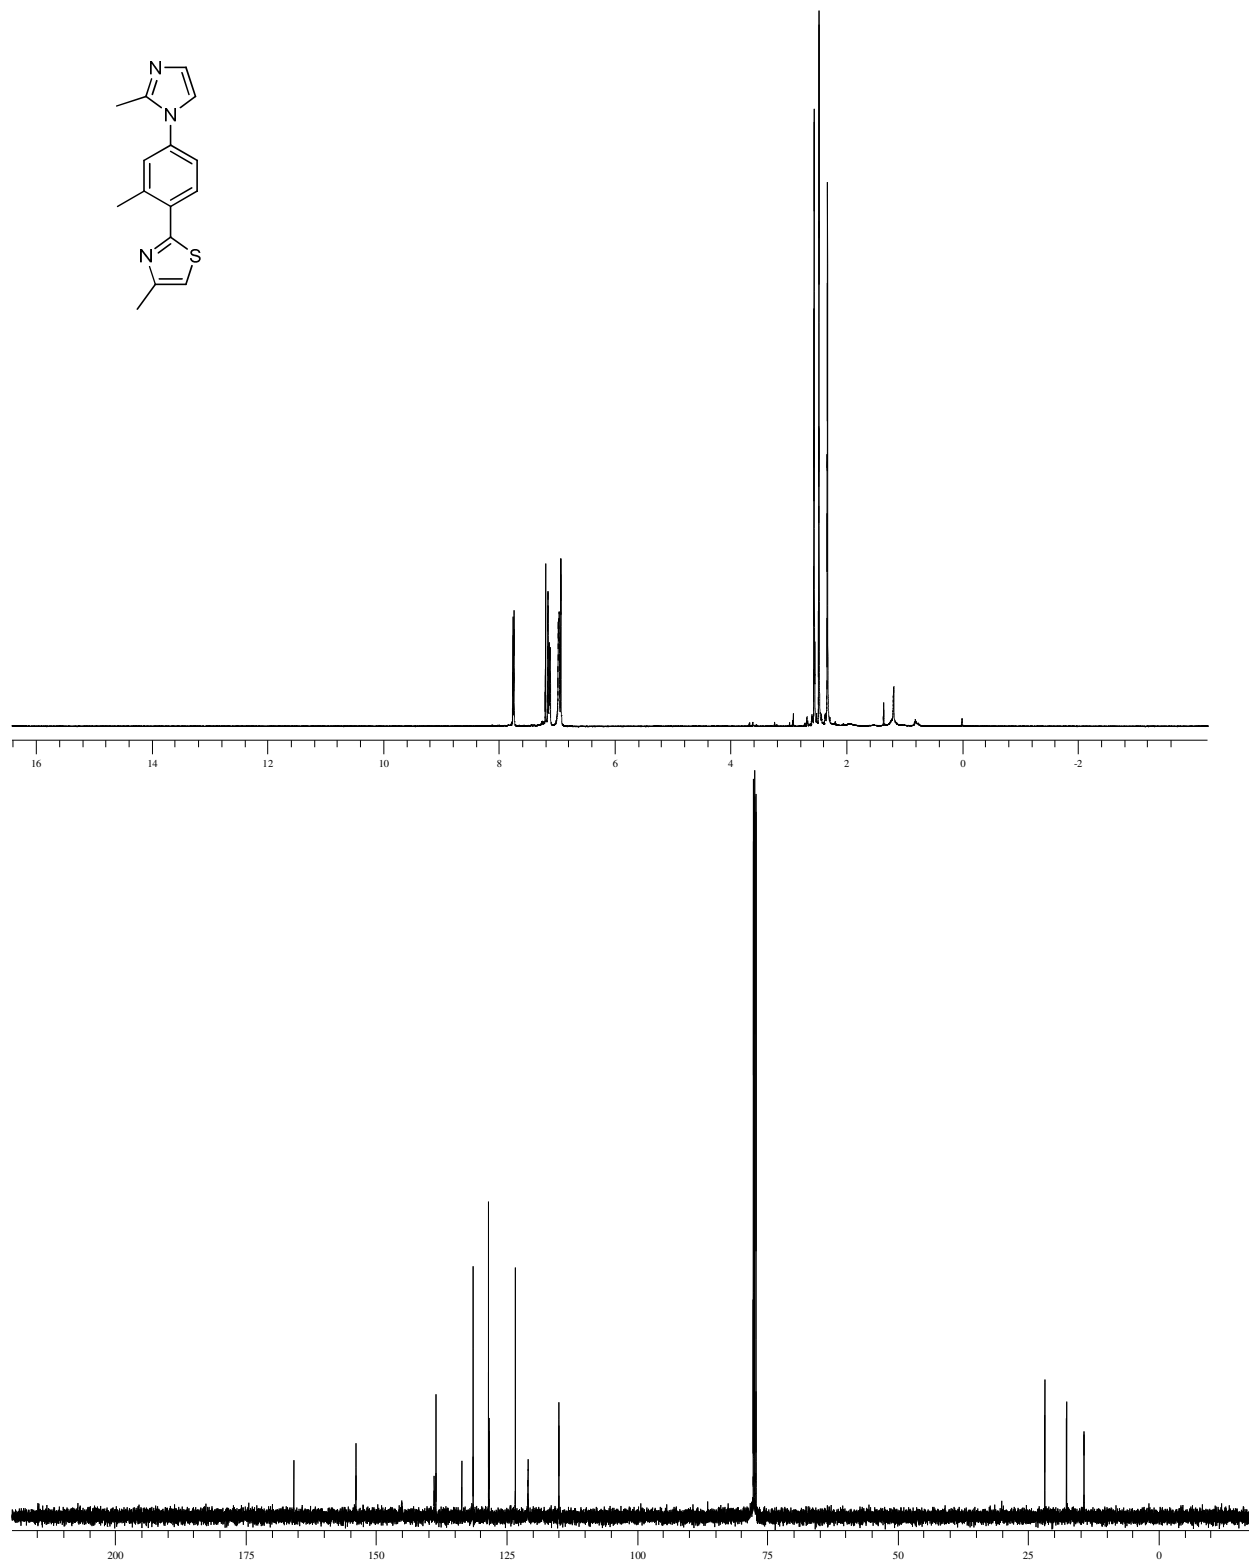

Methyl 3-(1H-imidazol-2-yl)propanoate:  $^1\text{H}$  and  $^{13}\text{C}$

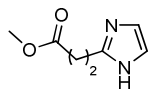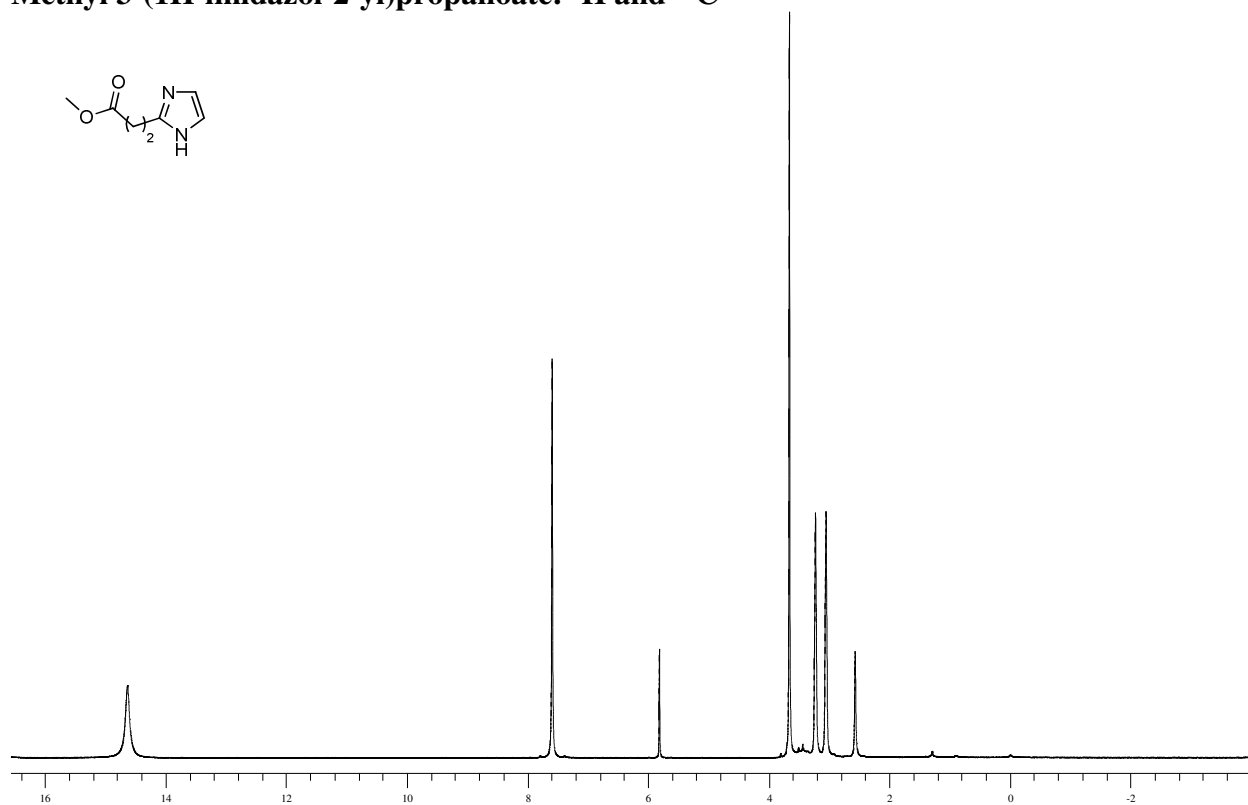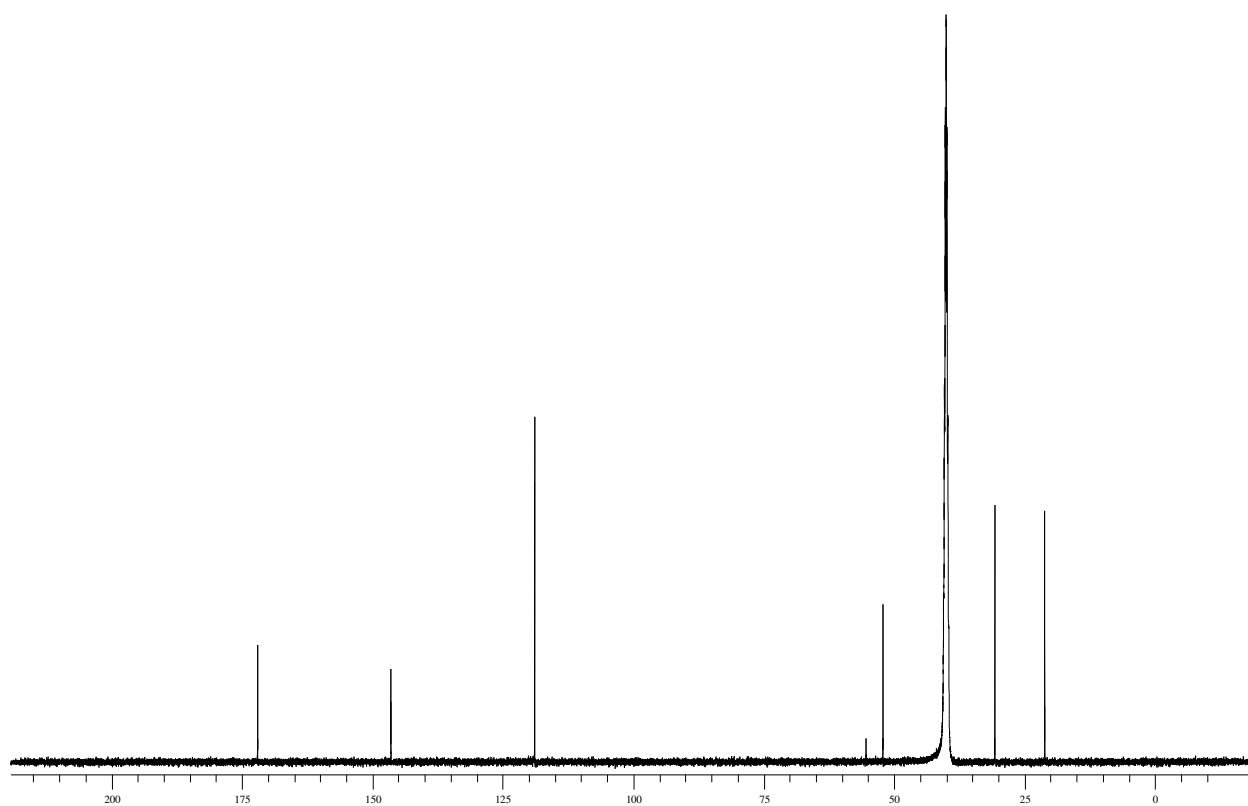

**Tert-butyl 3-(5-bromo-2-cyanophenoxy)propylcarbamate(6):  $^1\text{H}$  and  $^{13}\text{C}$**

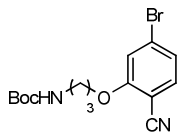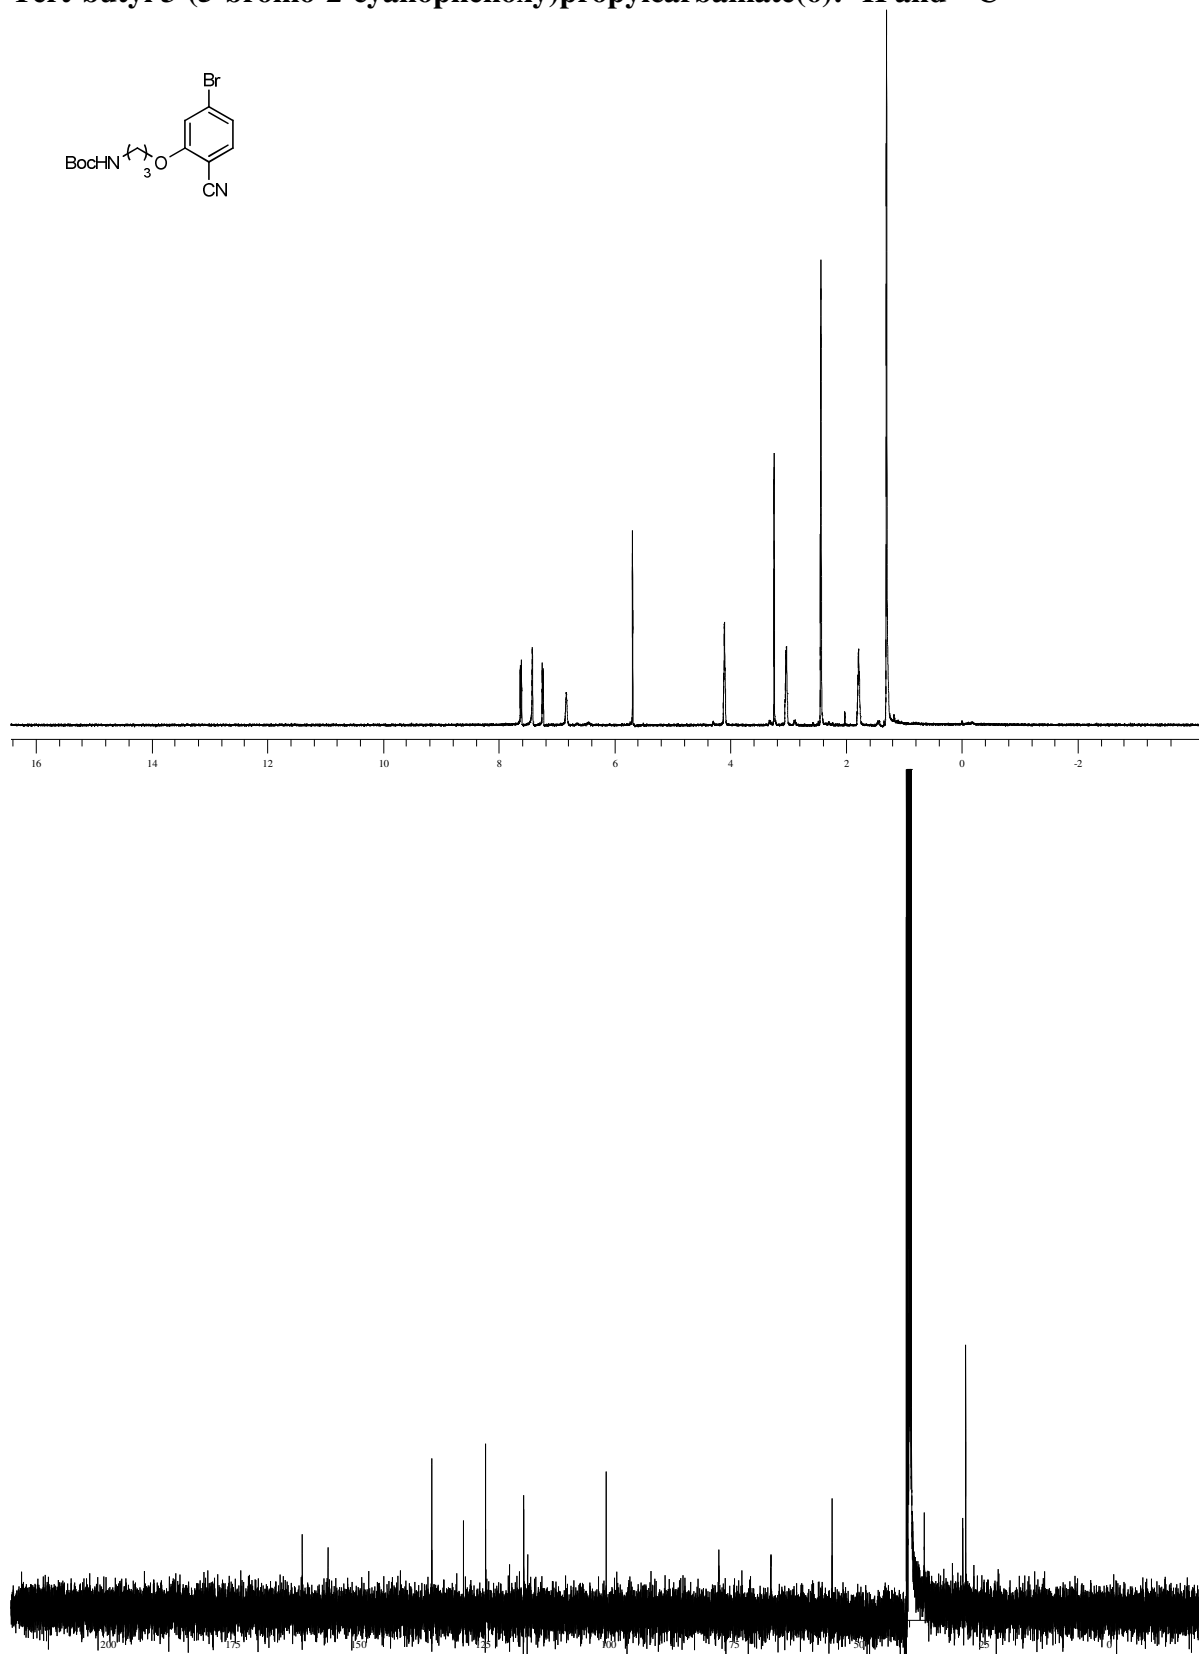

**Methyl 3-(1-(3-(3-(tert-butoxycarbonylamino)propoxy)-4-cyanophenyl)-1H-imidazol-2-yl)propanoate(7):  $^1\text{H}$  and  $^{13}\text{C}$**

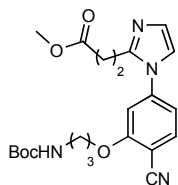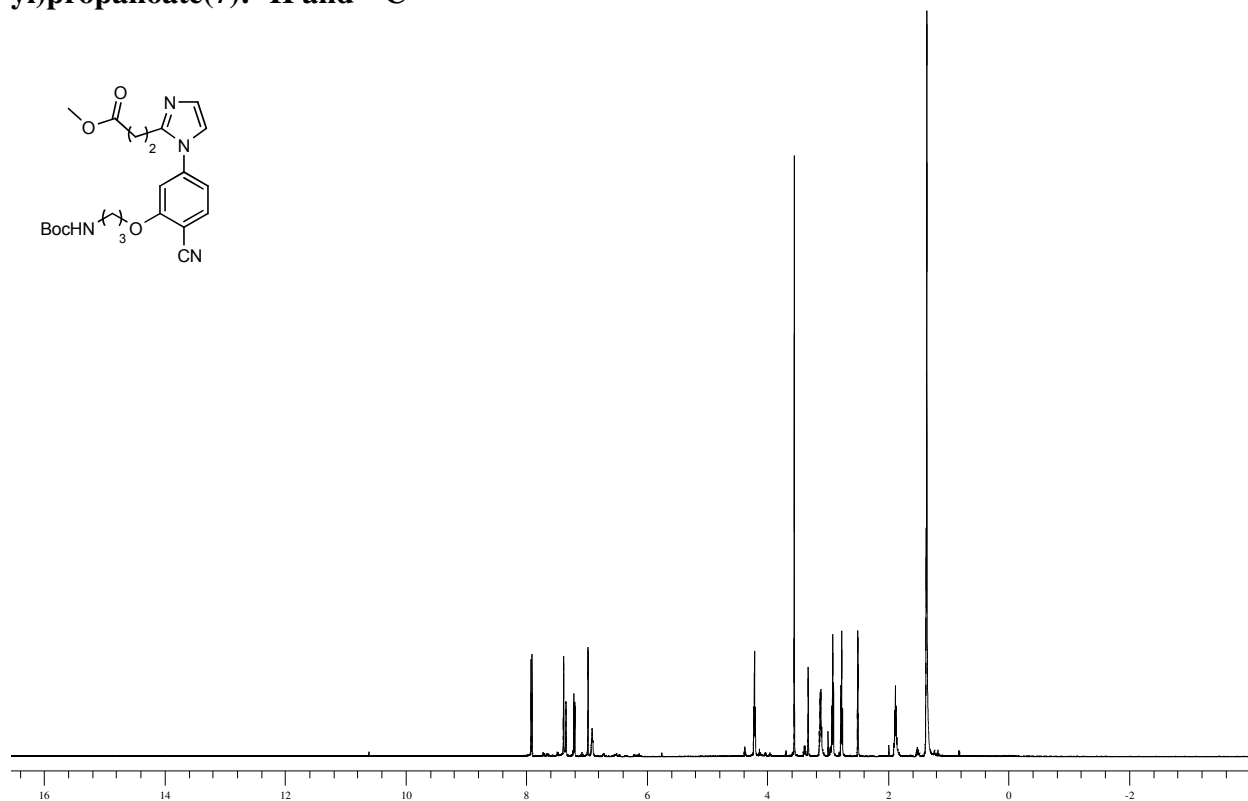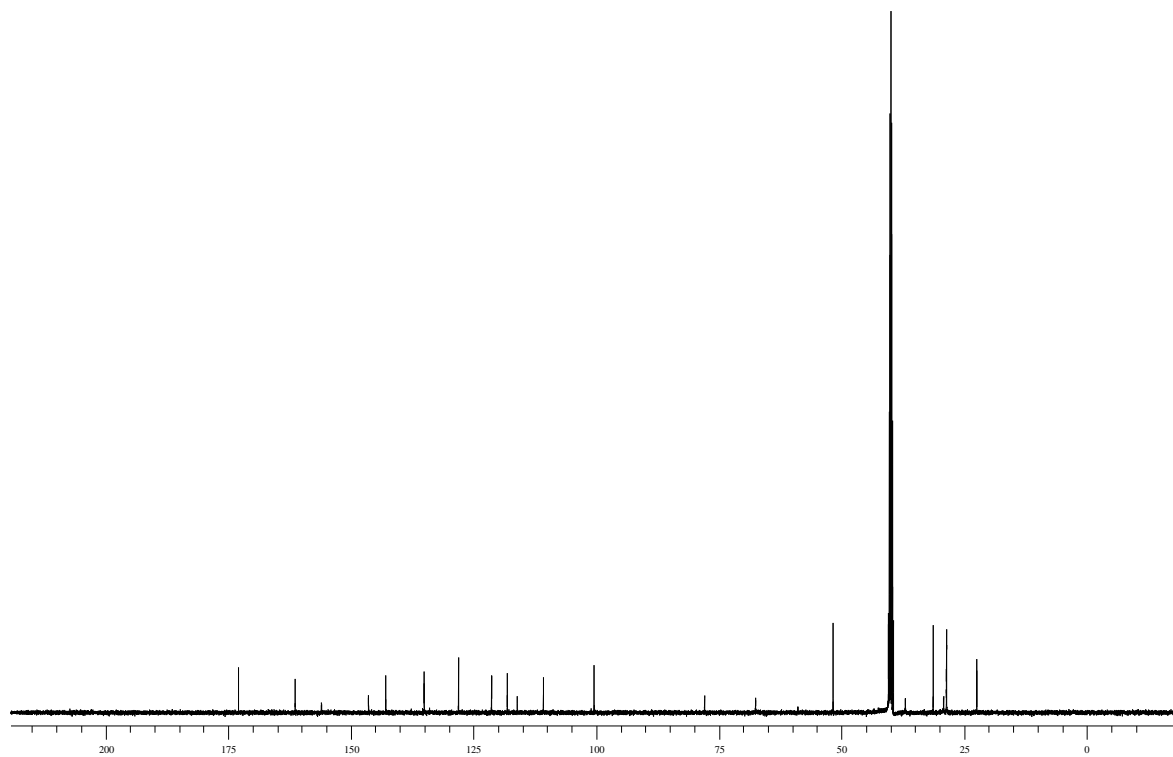

**Methyl 3-(1-(3-(3-(tert-butoxycarbonylamino)propoxy)-4-carbamothioylphenyl)-1H-imidazol-2-yl)propanoate(8):<sup>1</sup>H and <sup>13</sup>C**

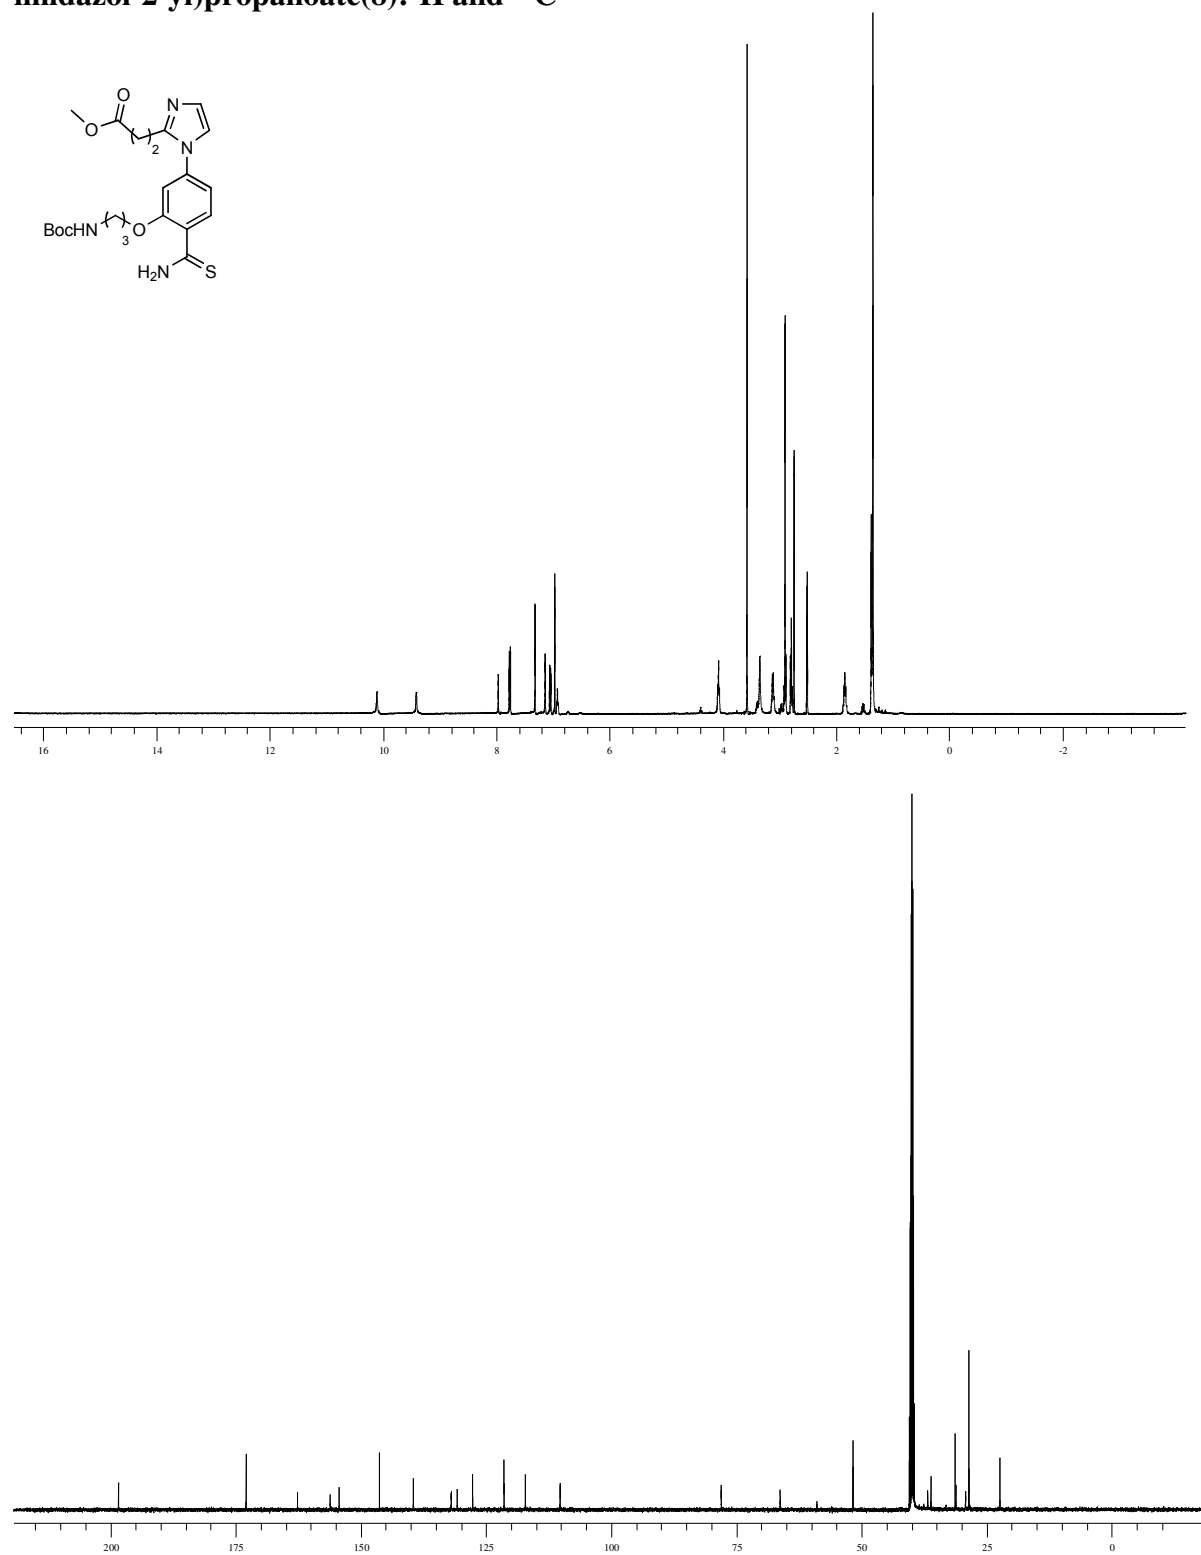



**Methyl 3-(1-(3-(3-(tert-butoxycarbonylamino)propoxy)-4-(4-isopropoxythiazol-2-yl)phenyl)-1H-imidazol-2-yl)propanoate(9):<sup>1</sup>H and <sup>13</sup>C**

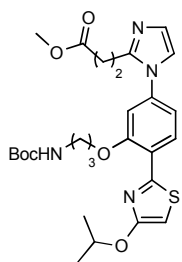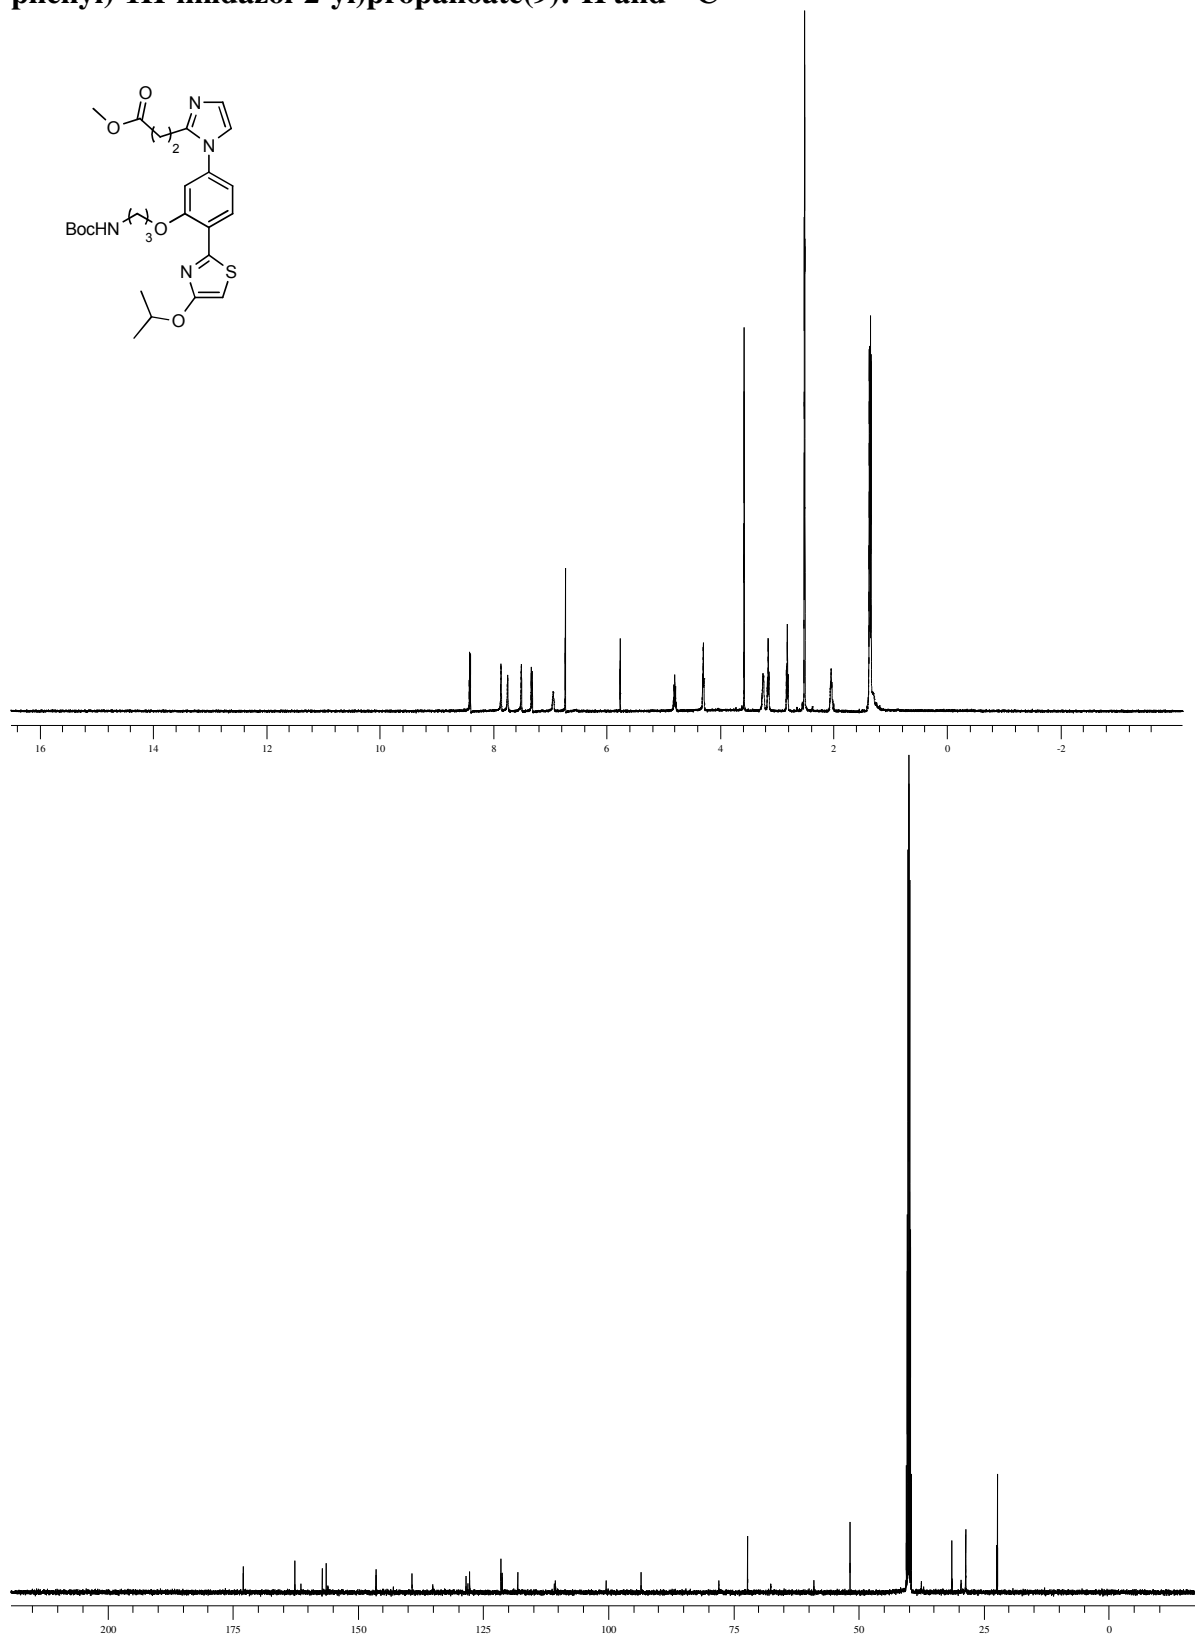

**3-(1-(3-(3-(tert-butoxycarbonylamino)propoxy)-4-(4-isopropoxythiazol-2-yl)phenyl)-1H-imidazol-2-yl)propanoic acid(10):<sup>1</sup>H and <sup>13</sup>C**

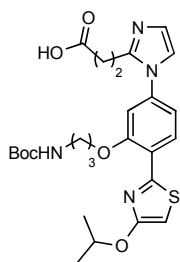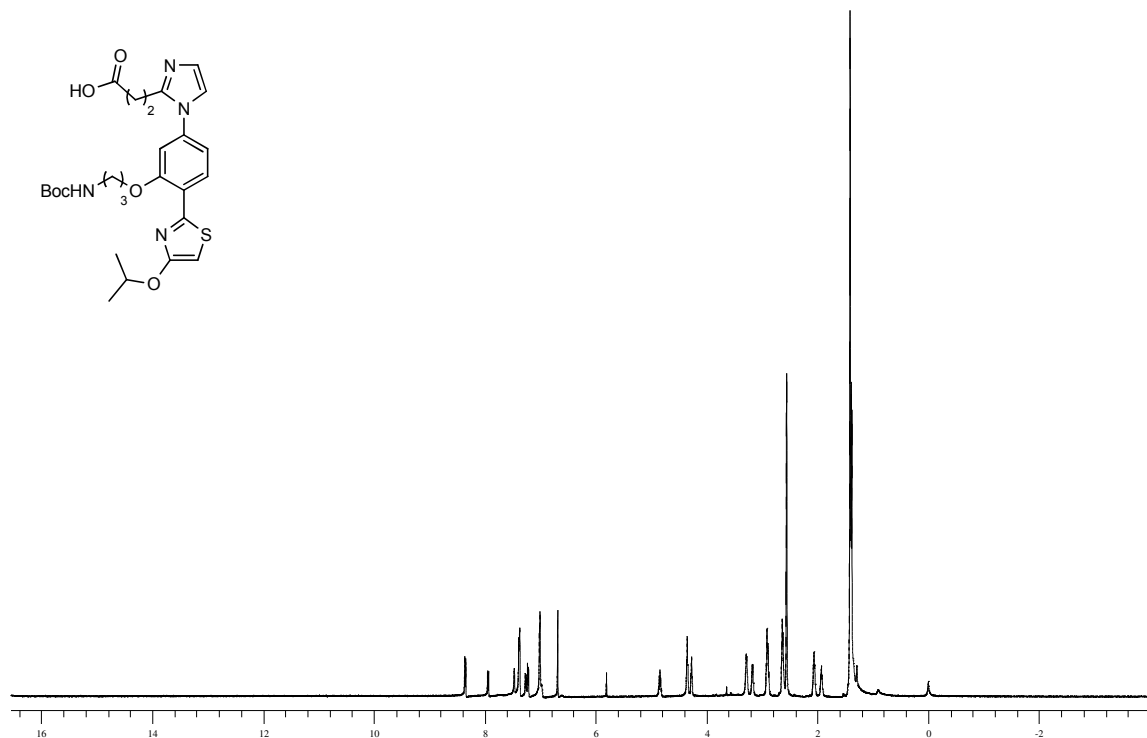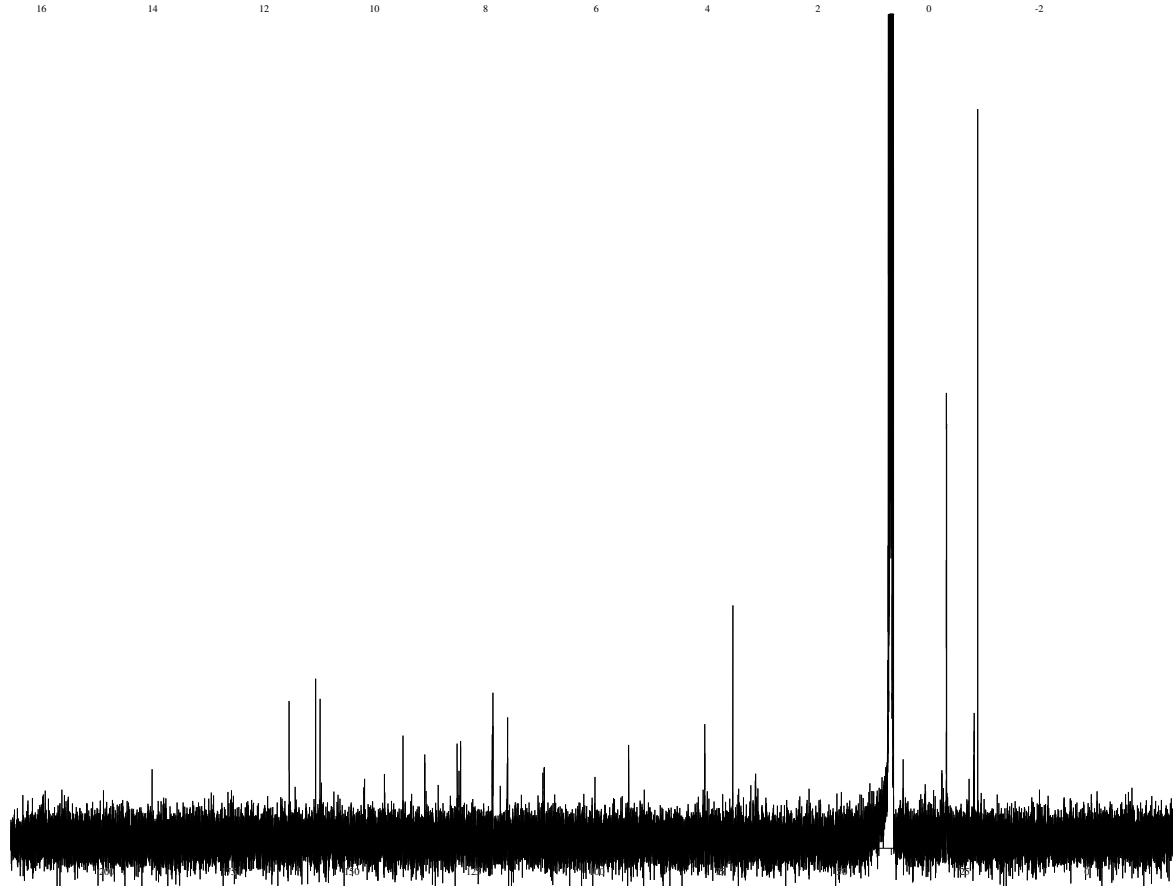

**Tert-butyl 3-(5-(2-(3-amino-3-oxopropyl)-1H-imidazol-1-yl)-2-(4-isopropoxythiazol-2-yl)phenoxy)propylcarbamate (11):  $^1\text{H}$  and  $^{13}\text{C}$**

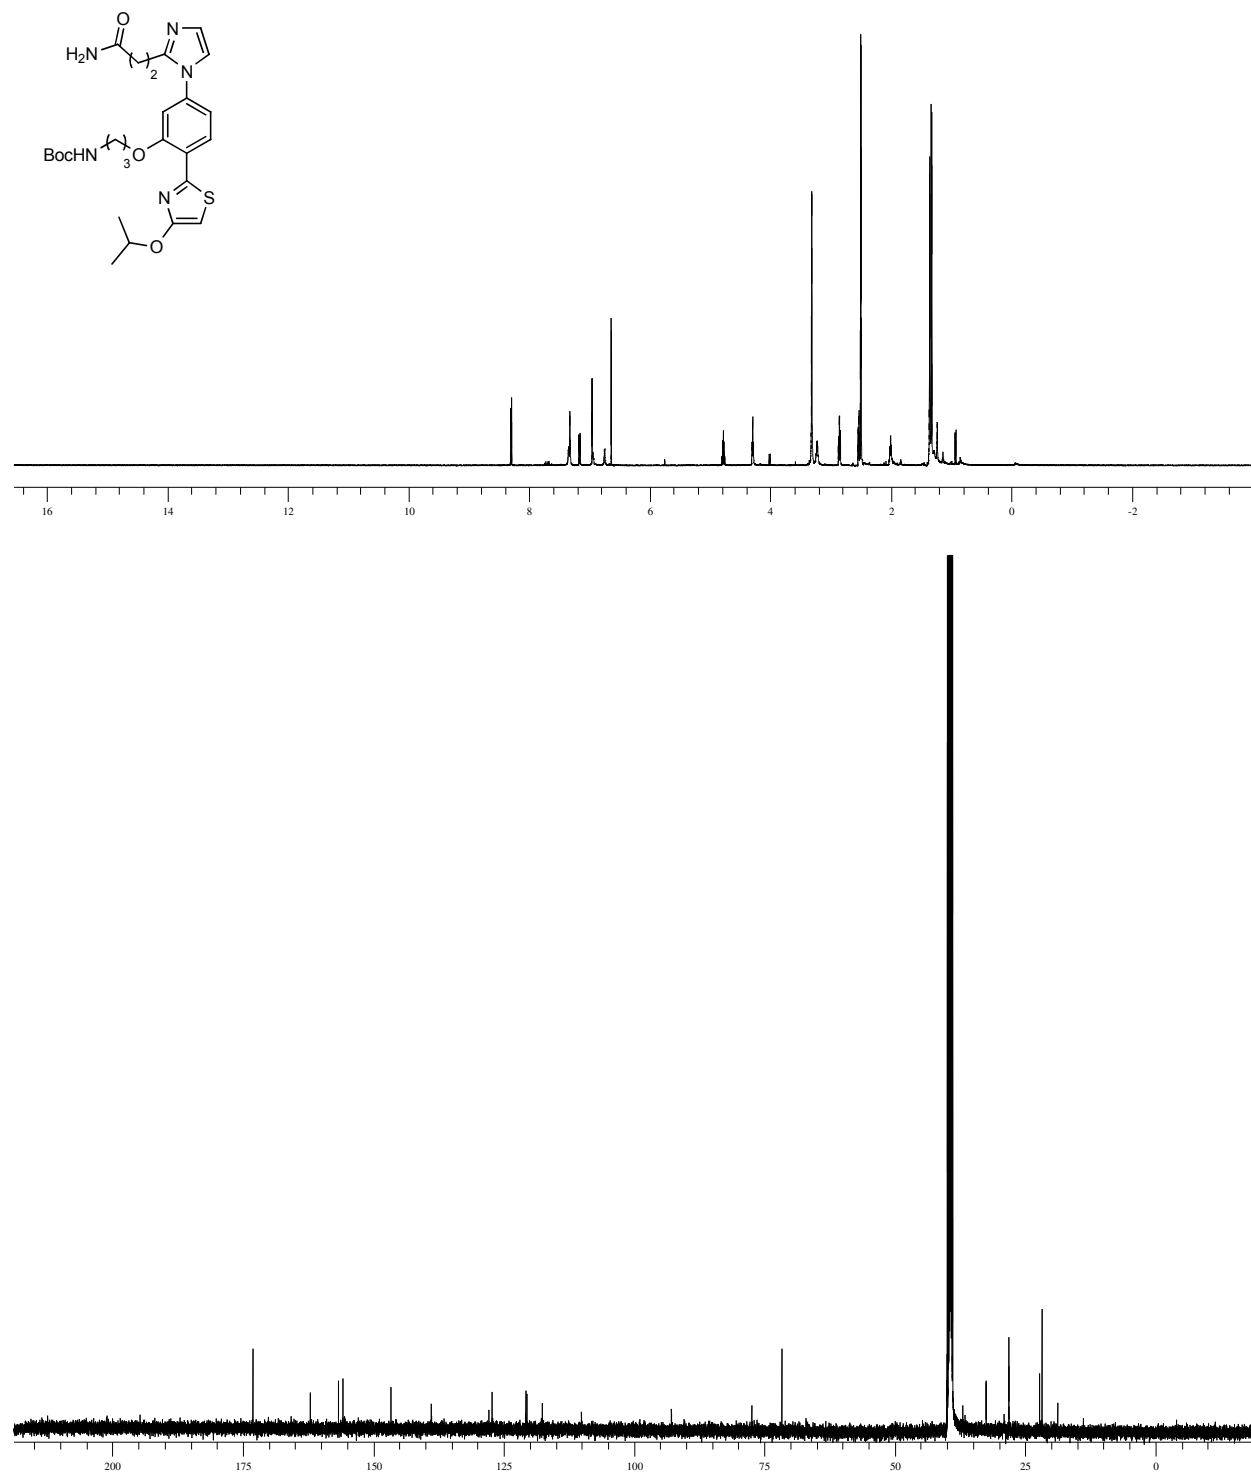

**3-(1-(3-(3-aminopropoxy)-4-(4-isopropoxythiazol-2-yl)phenyl)-1H-imidazol-2-yl)propanamide (TFA salt) (12):  $^1\text{H}$  and  $^{13}\text{C}$**

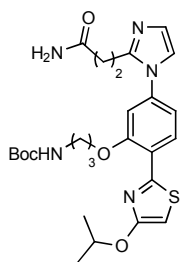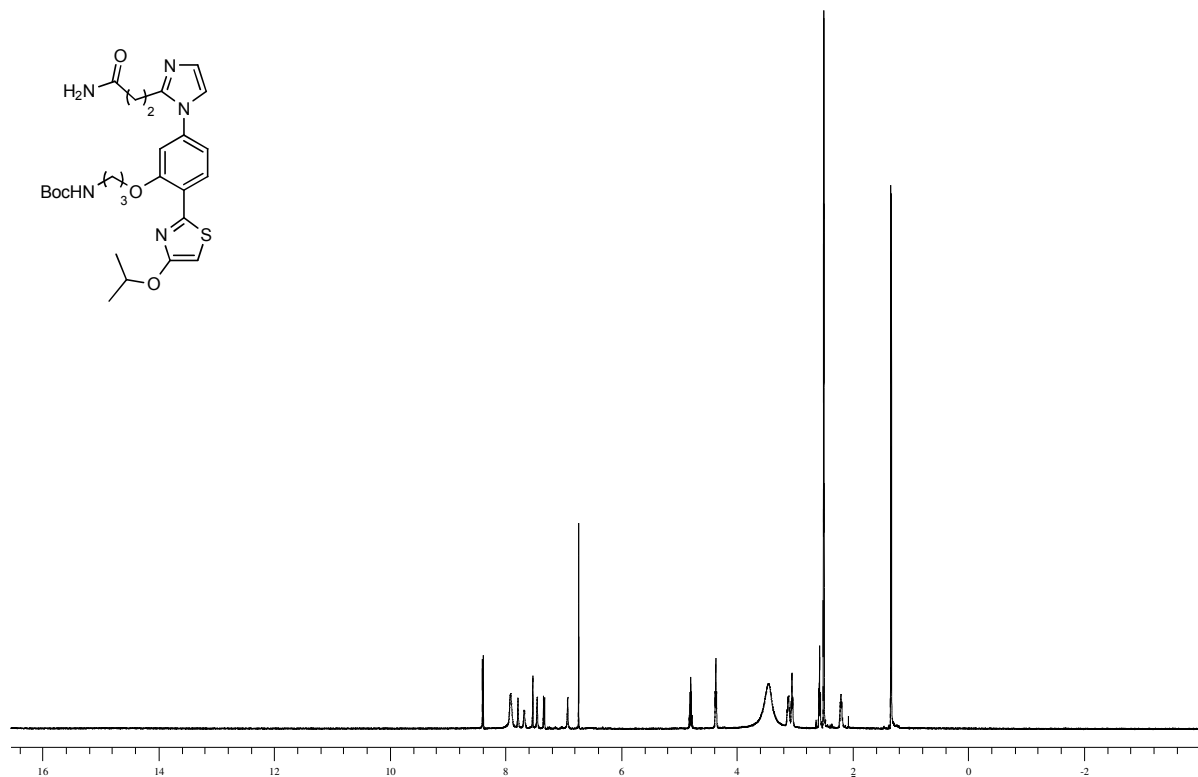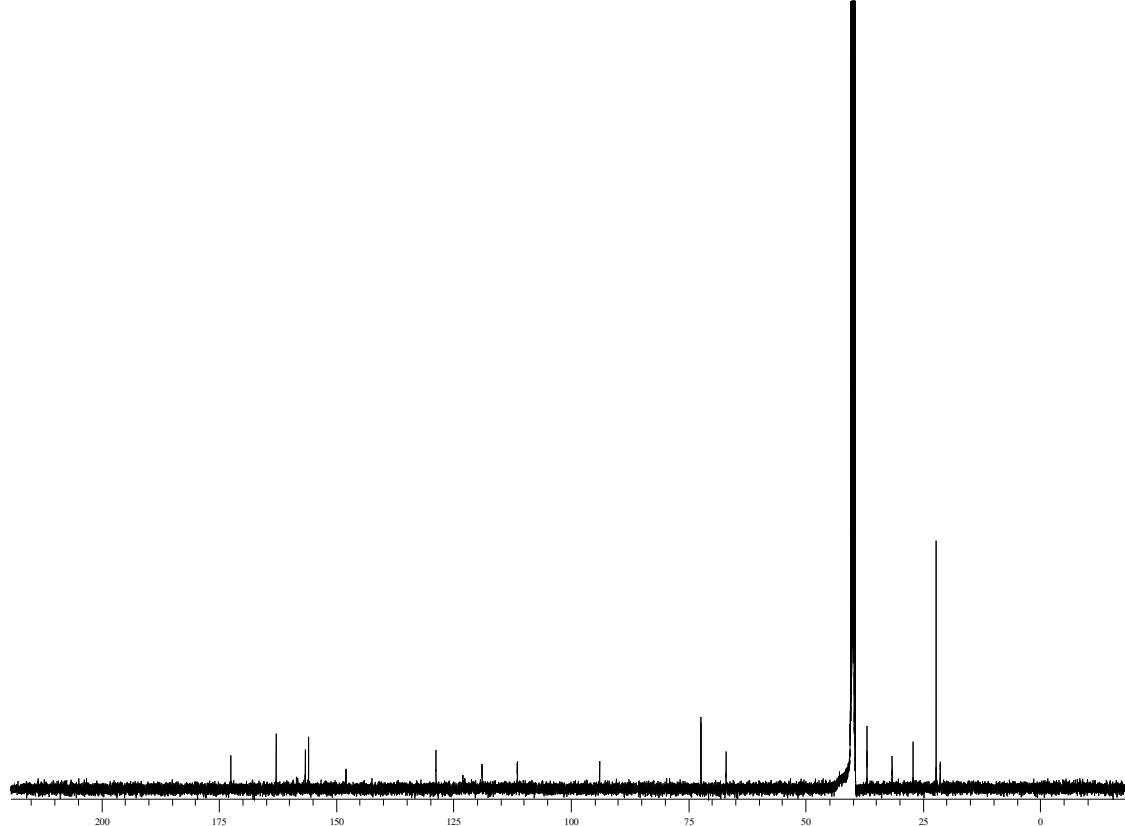

**Dimethyl 1H-benzo[d]imidazole-5,6-dicarboxylate (14):  $^1\text{H}$  and  $^{13}\text{C}$**

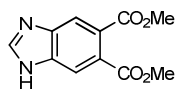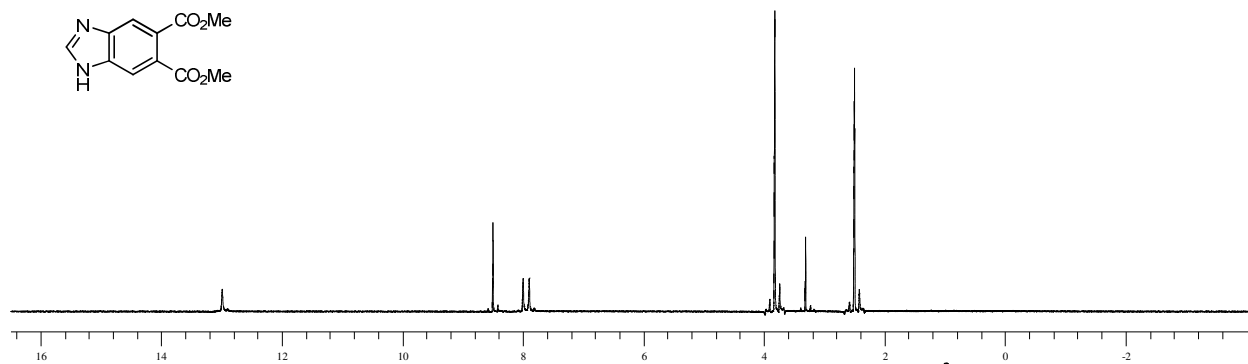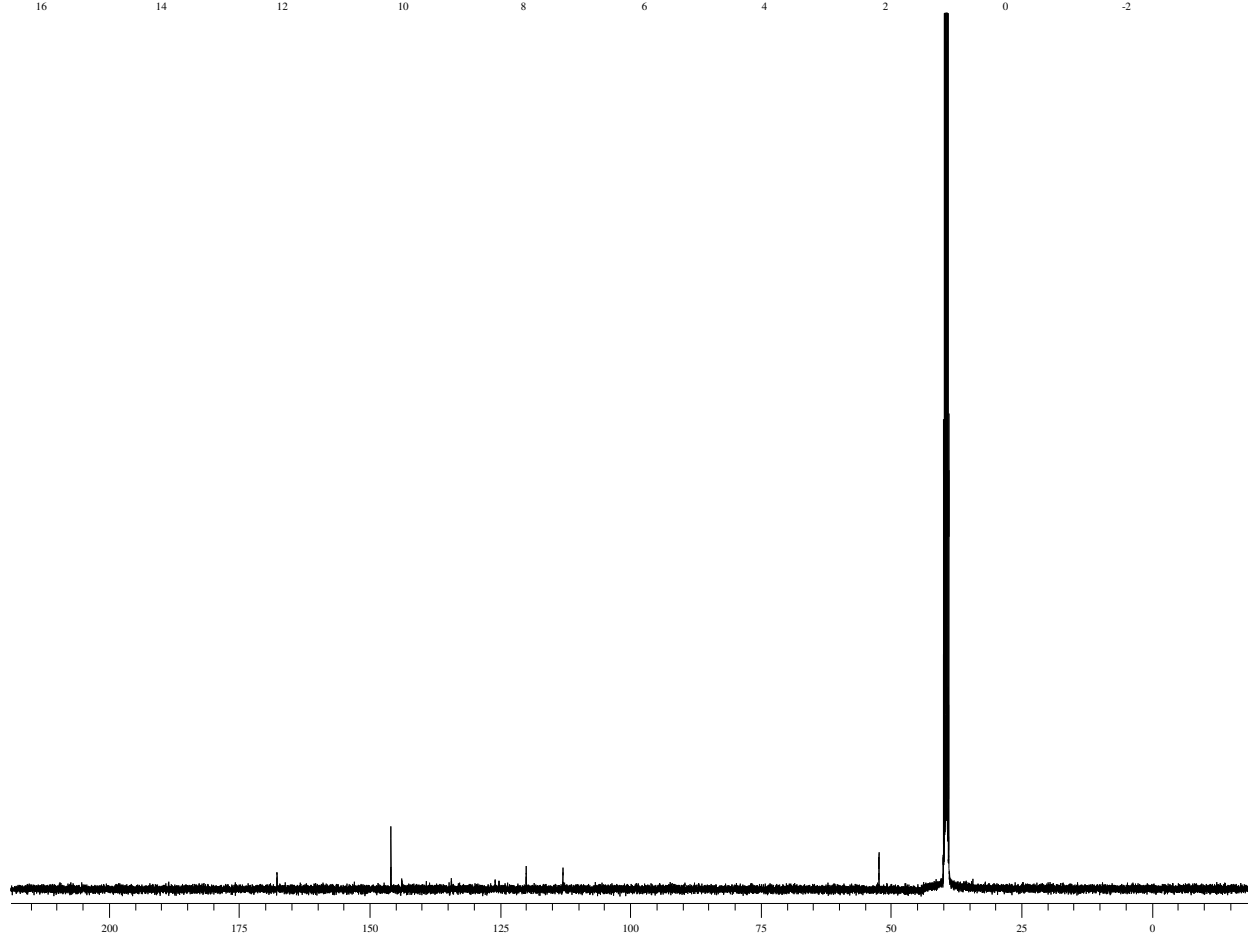

**Dimethyl 1-(3-bromo-4-cyanophenyl)-1H-benzo[d]imidazole-5,6-dicarboxylate (15):  $^1\text{H}$  and  $^{13}\text{C}$**

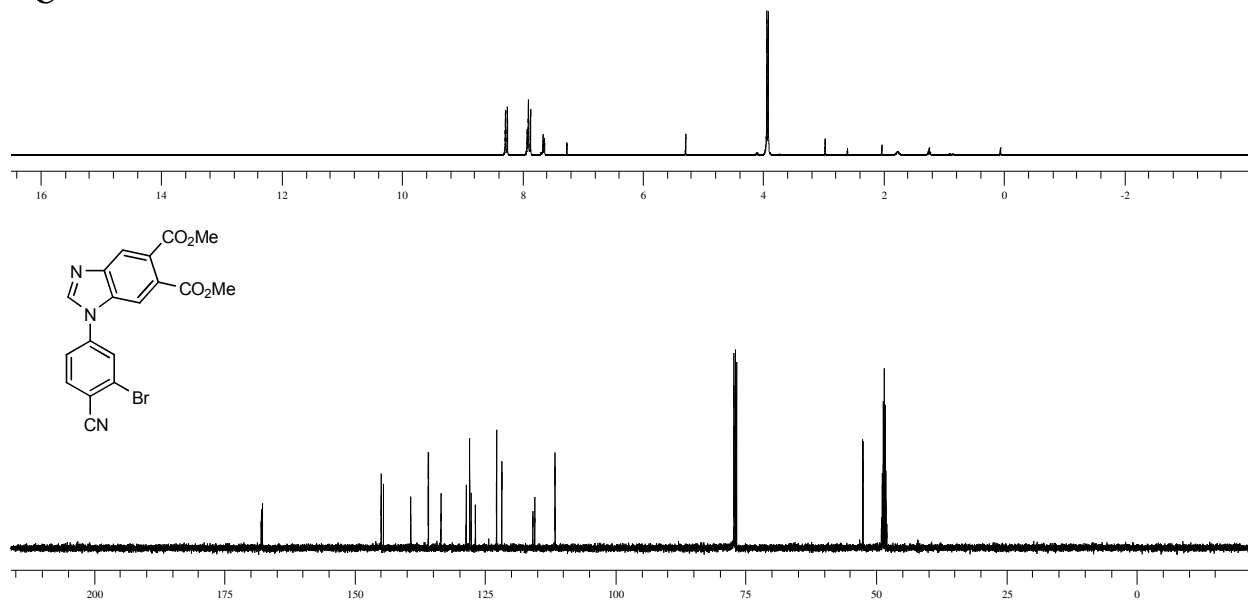

**Dimethyl 1-(3-bromo-4-carbamothioylphenyl)-1H-benzo[d]imidazole-5,6-dicarboxylate (16):  $^1\text{H}$  and  $^{13}\text{C}$**

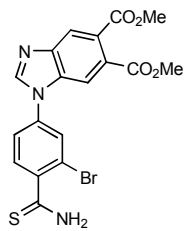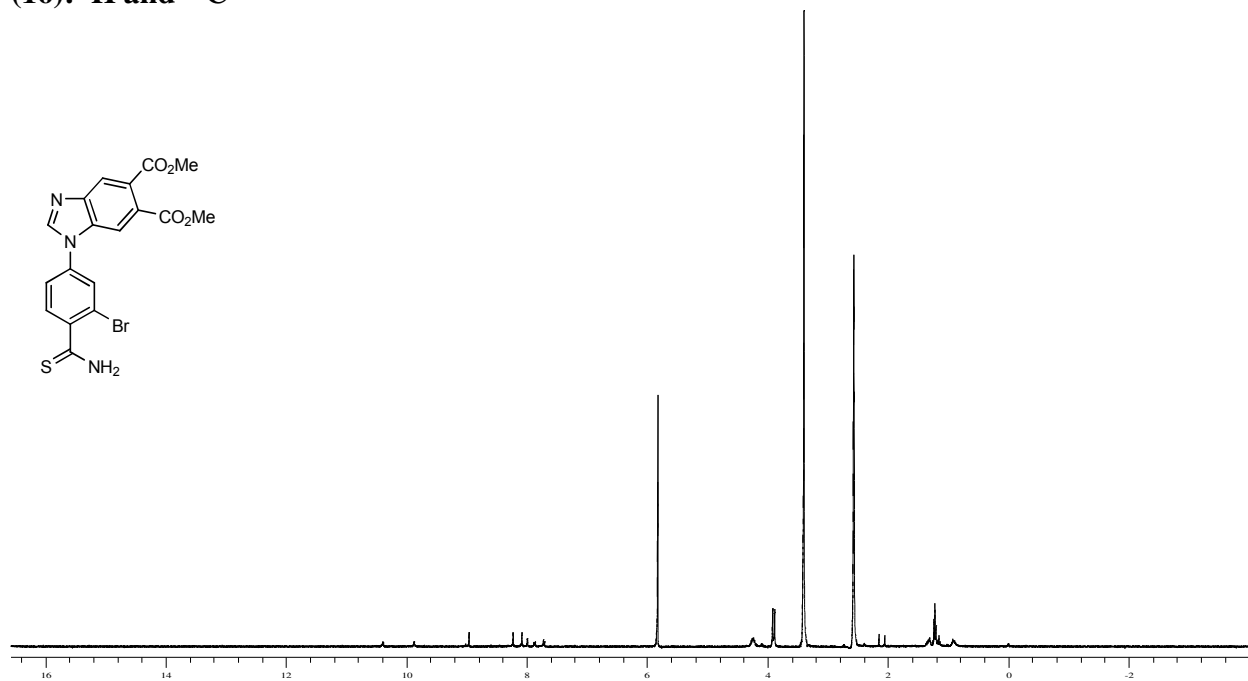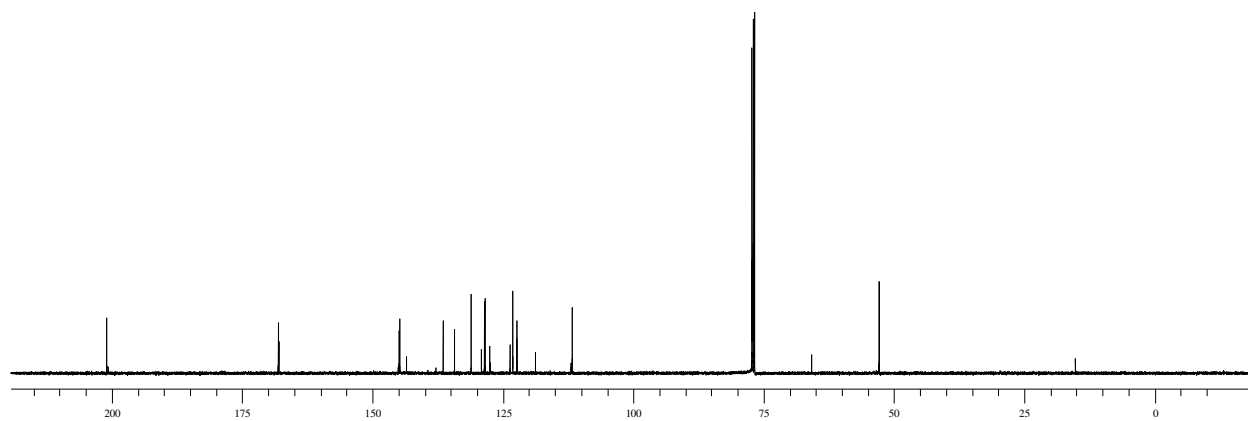

**Dimethyl 1-(3-bromo-4-(4-o-tolylthiazol-2-yl)phenyl)-1H-benzo[d]imidazole-5,6-dicarboxylate (17):  $^1\text{H}$  and  $^{13}\text{C}$**

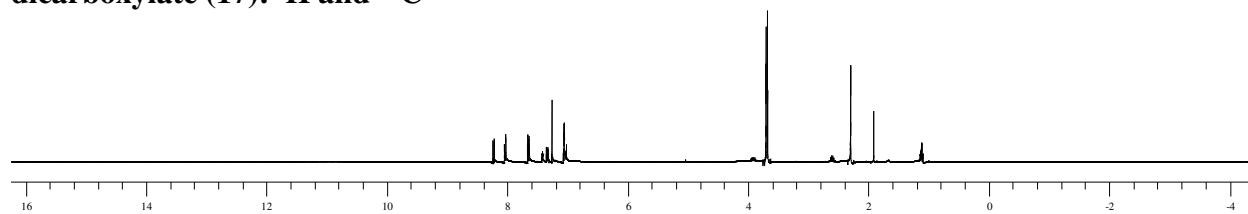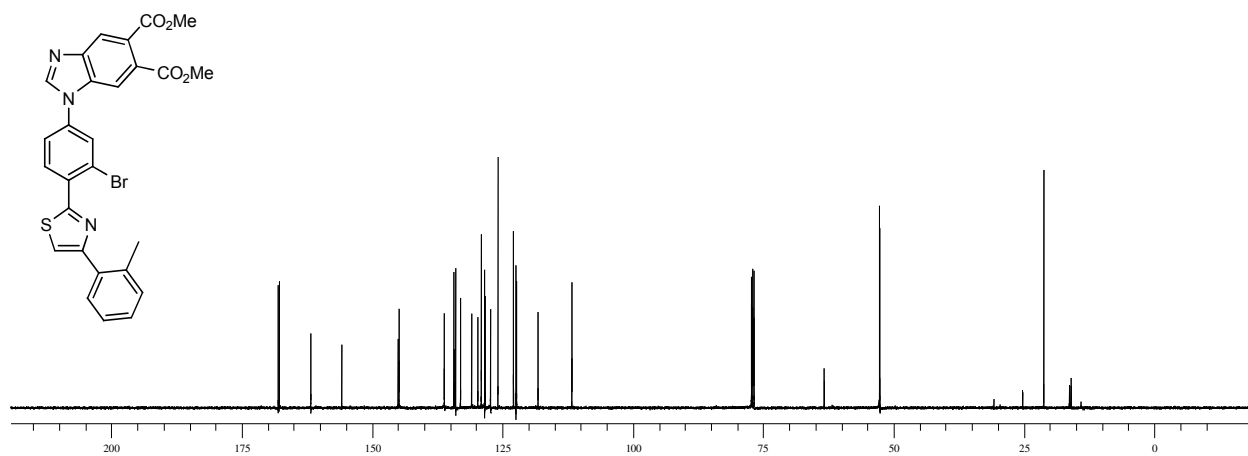



**Dimethyl 1-(3'-amino-6-(4-o-tolylthiazol-2-yl)biphenyl-3-yl)-1H-benzo[d]imidazole-5,6-dicarboxylate (18):  $^1\text{H}$  and  $^{13}\text{C}$**

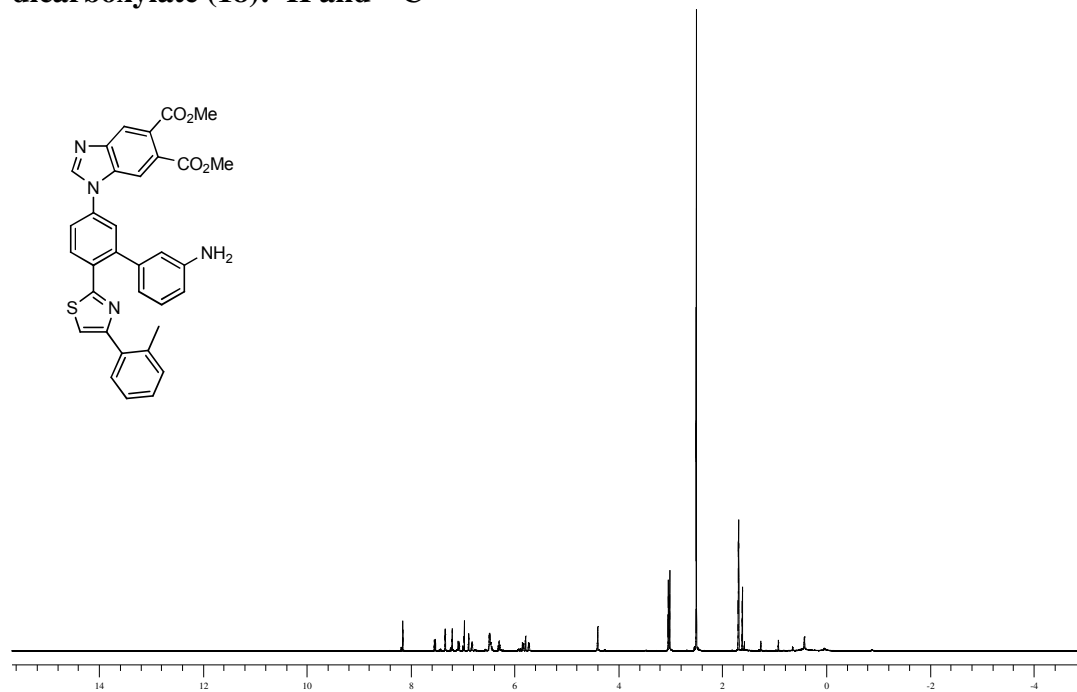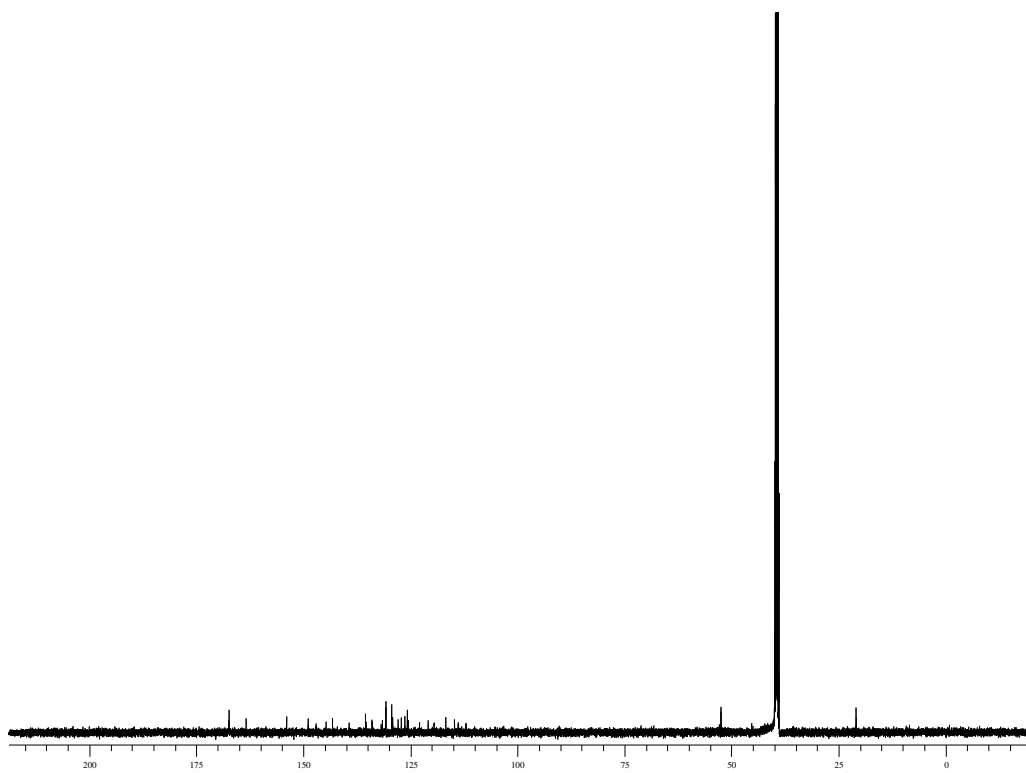

**1-(3'-amino-6-(4-o-tolylthiazol-2-yl)biphenyl-3-yl)-1H-benzo[d]imidazole-5,6-dicarboxylic acid (19): <sup>1</sup>H and <sup>13</sup>C**

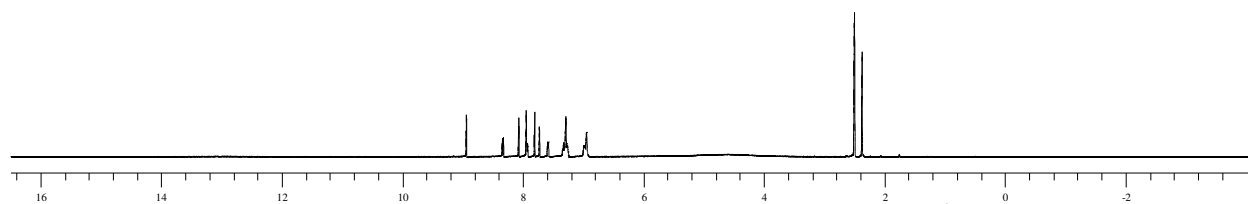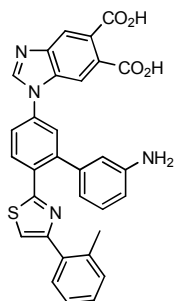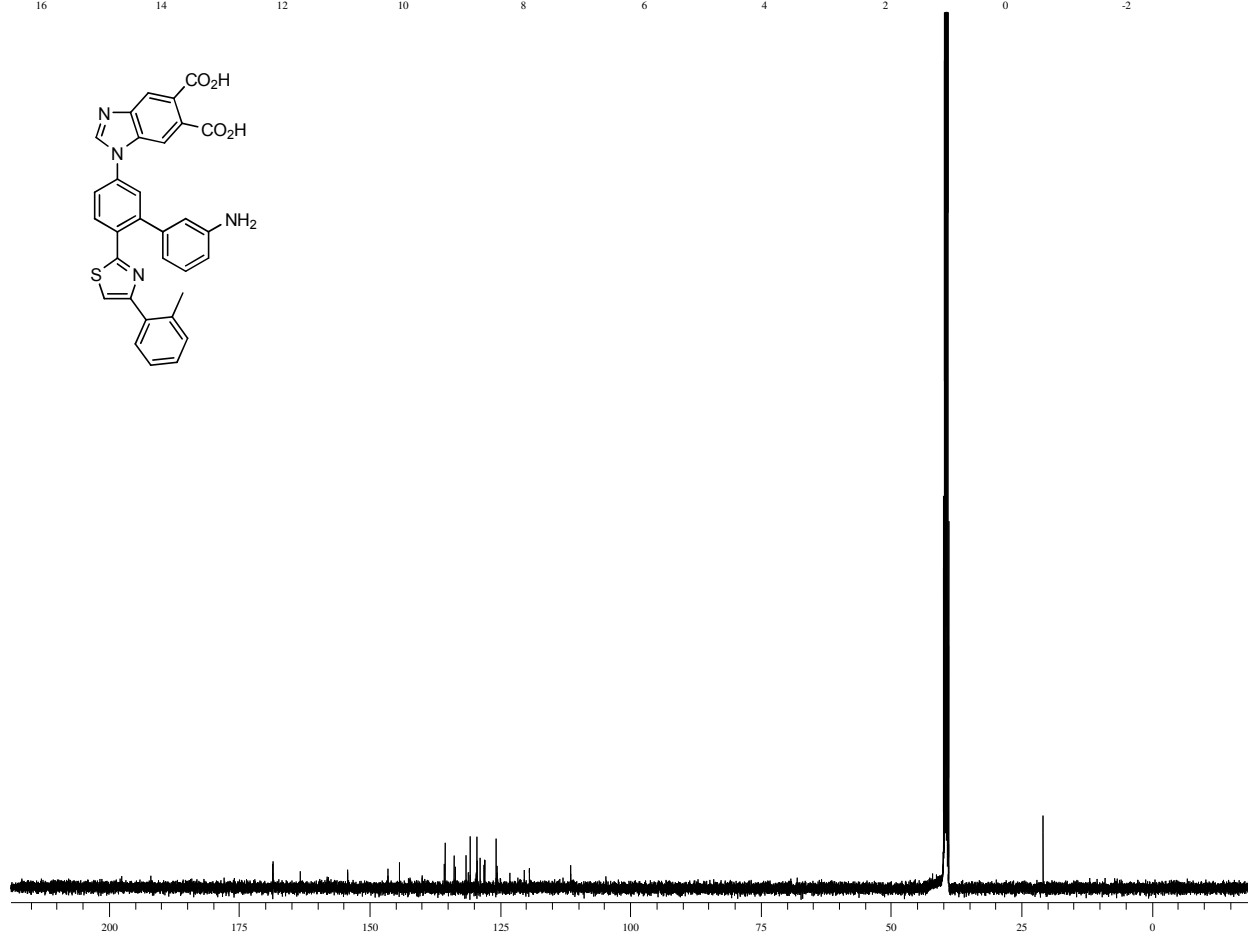

Supplement: NIHMS91470-supplement-2_si_002.pdf [file NIHMS91470-supplement-2_si_002.pdf]
